# Supplementary material for: PBAF chromatin remodeler complexes that mediate meiotic transitions in mouse
Source: Oxford University Press journal article supplement (doi:10.1242/dev.199967), 2022-09-15
Supplement: dev199967supp.pdf [file dev199967supp.pdf]

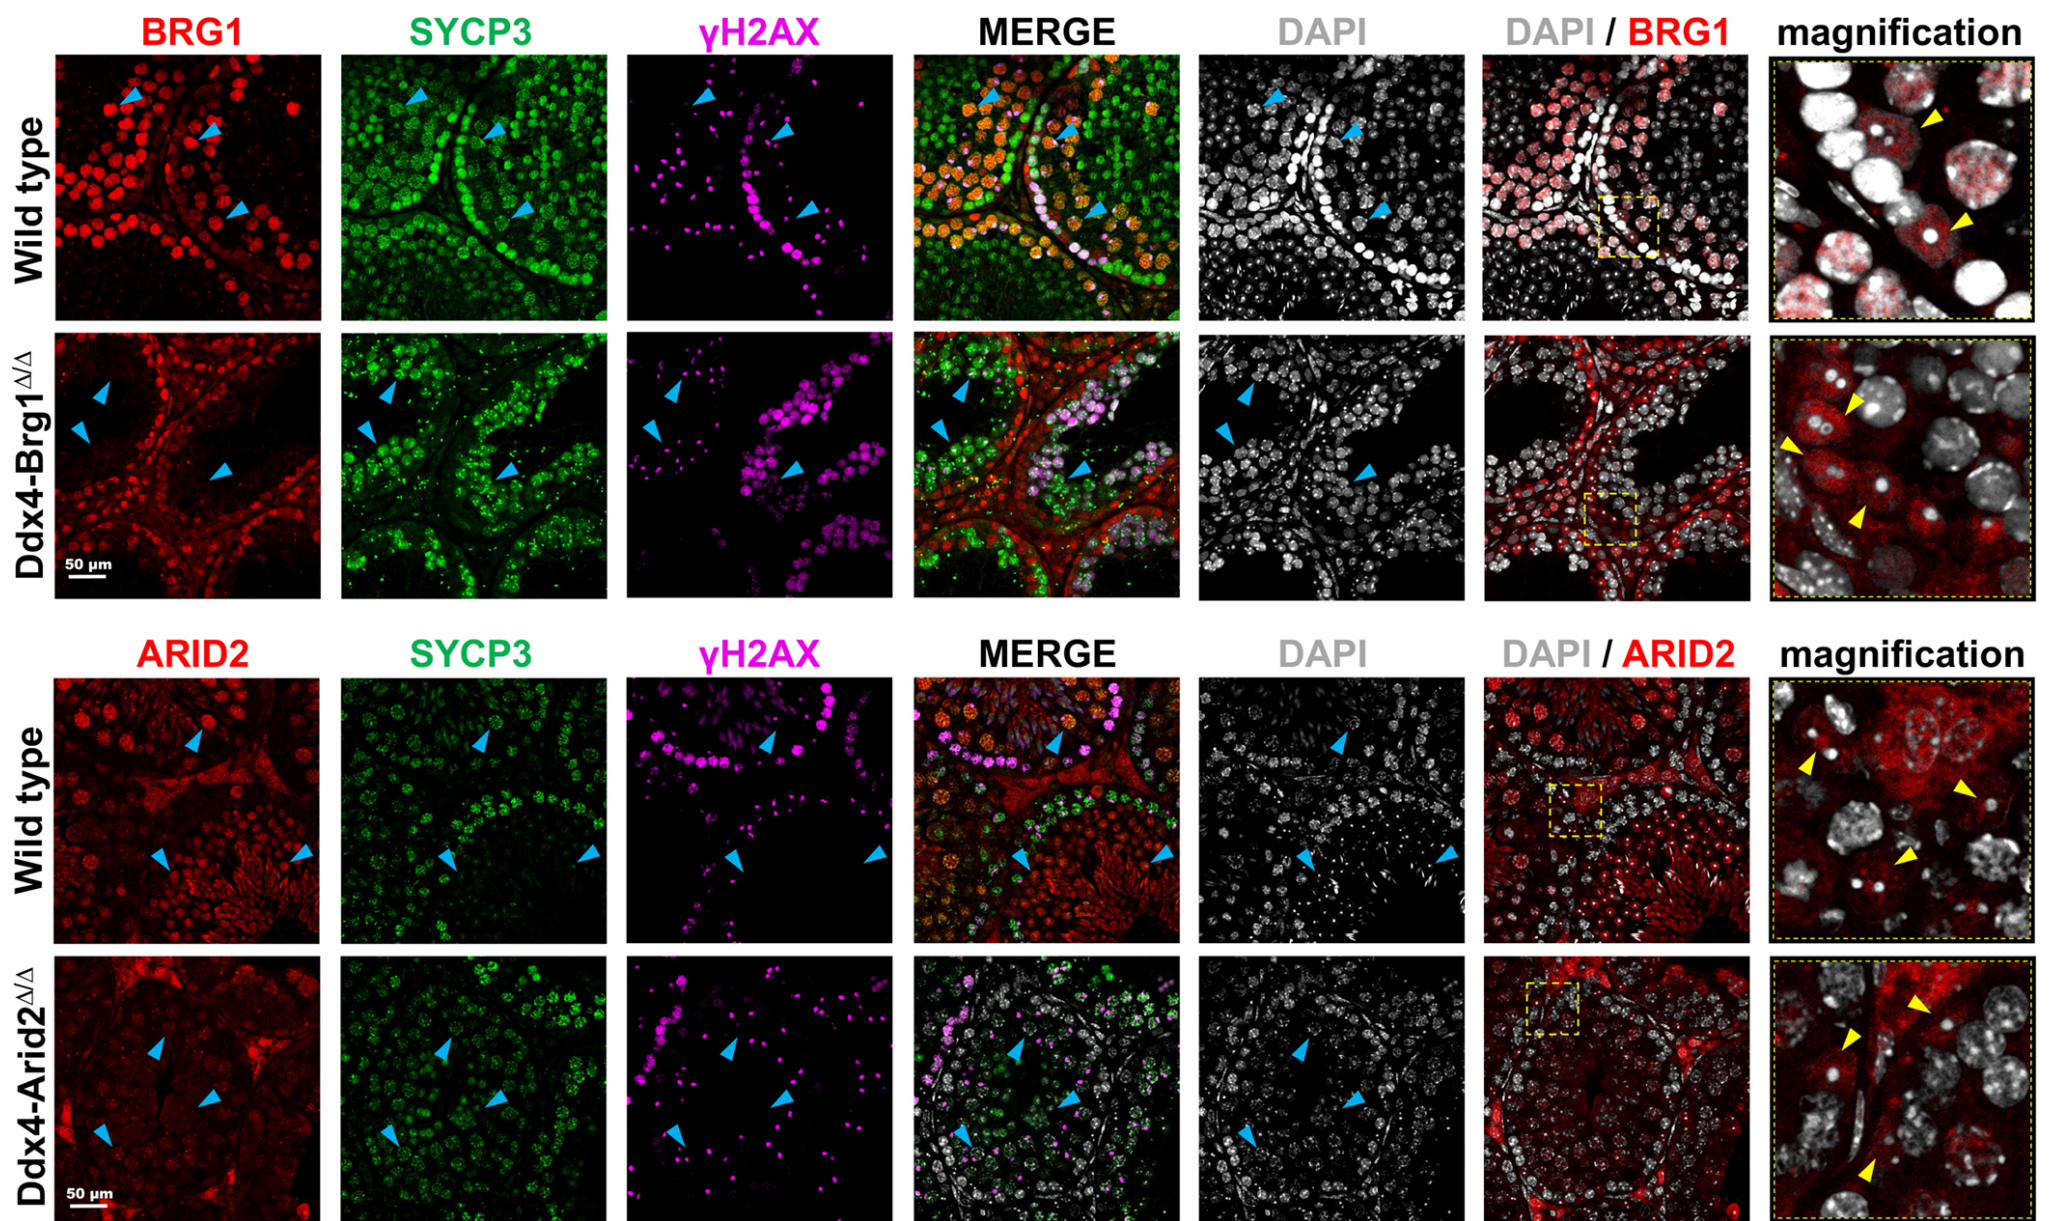

**Fig. S1. Immunolocalization of BRG1 and ARID2 in paraffin embedded mouse testis sections.** SYCP3 and  $\gamma$ H2AX immunostaining serve to classify primary spermatocytes at different stages of prophase I in 2-month-old testis. Blue arrowheads mark examples of positive primary spermatocytes in wild type and examples of primary spermatocytes with negative immunostaining for BRG1 and ARID2 in knockout testis. Magnifications in the far-right panels correspond to the yellow square inserts. Yellow arrowheads show examples of Sertoli cells still expressing BRG1 or ARID2 proteins in both wild type and knockout mice.

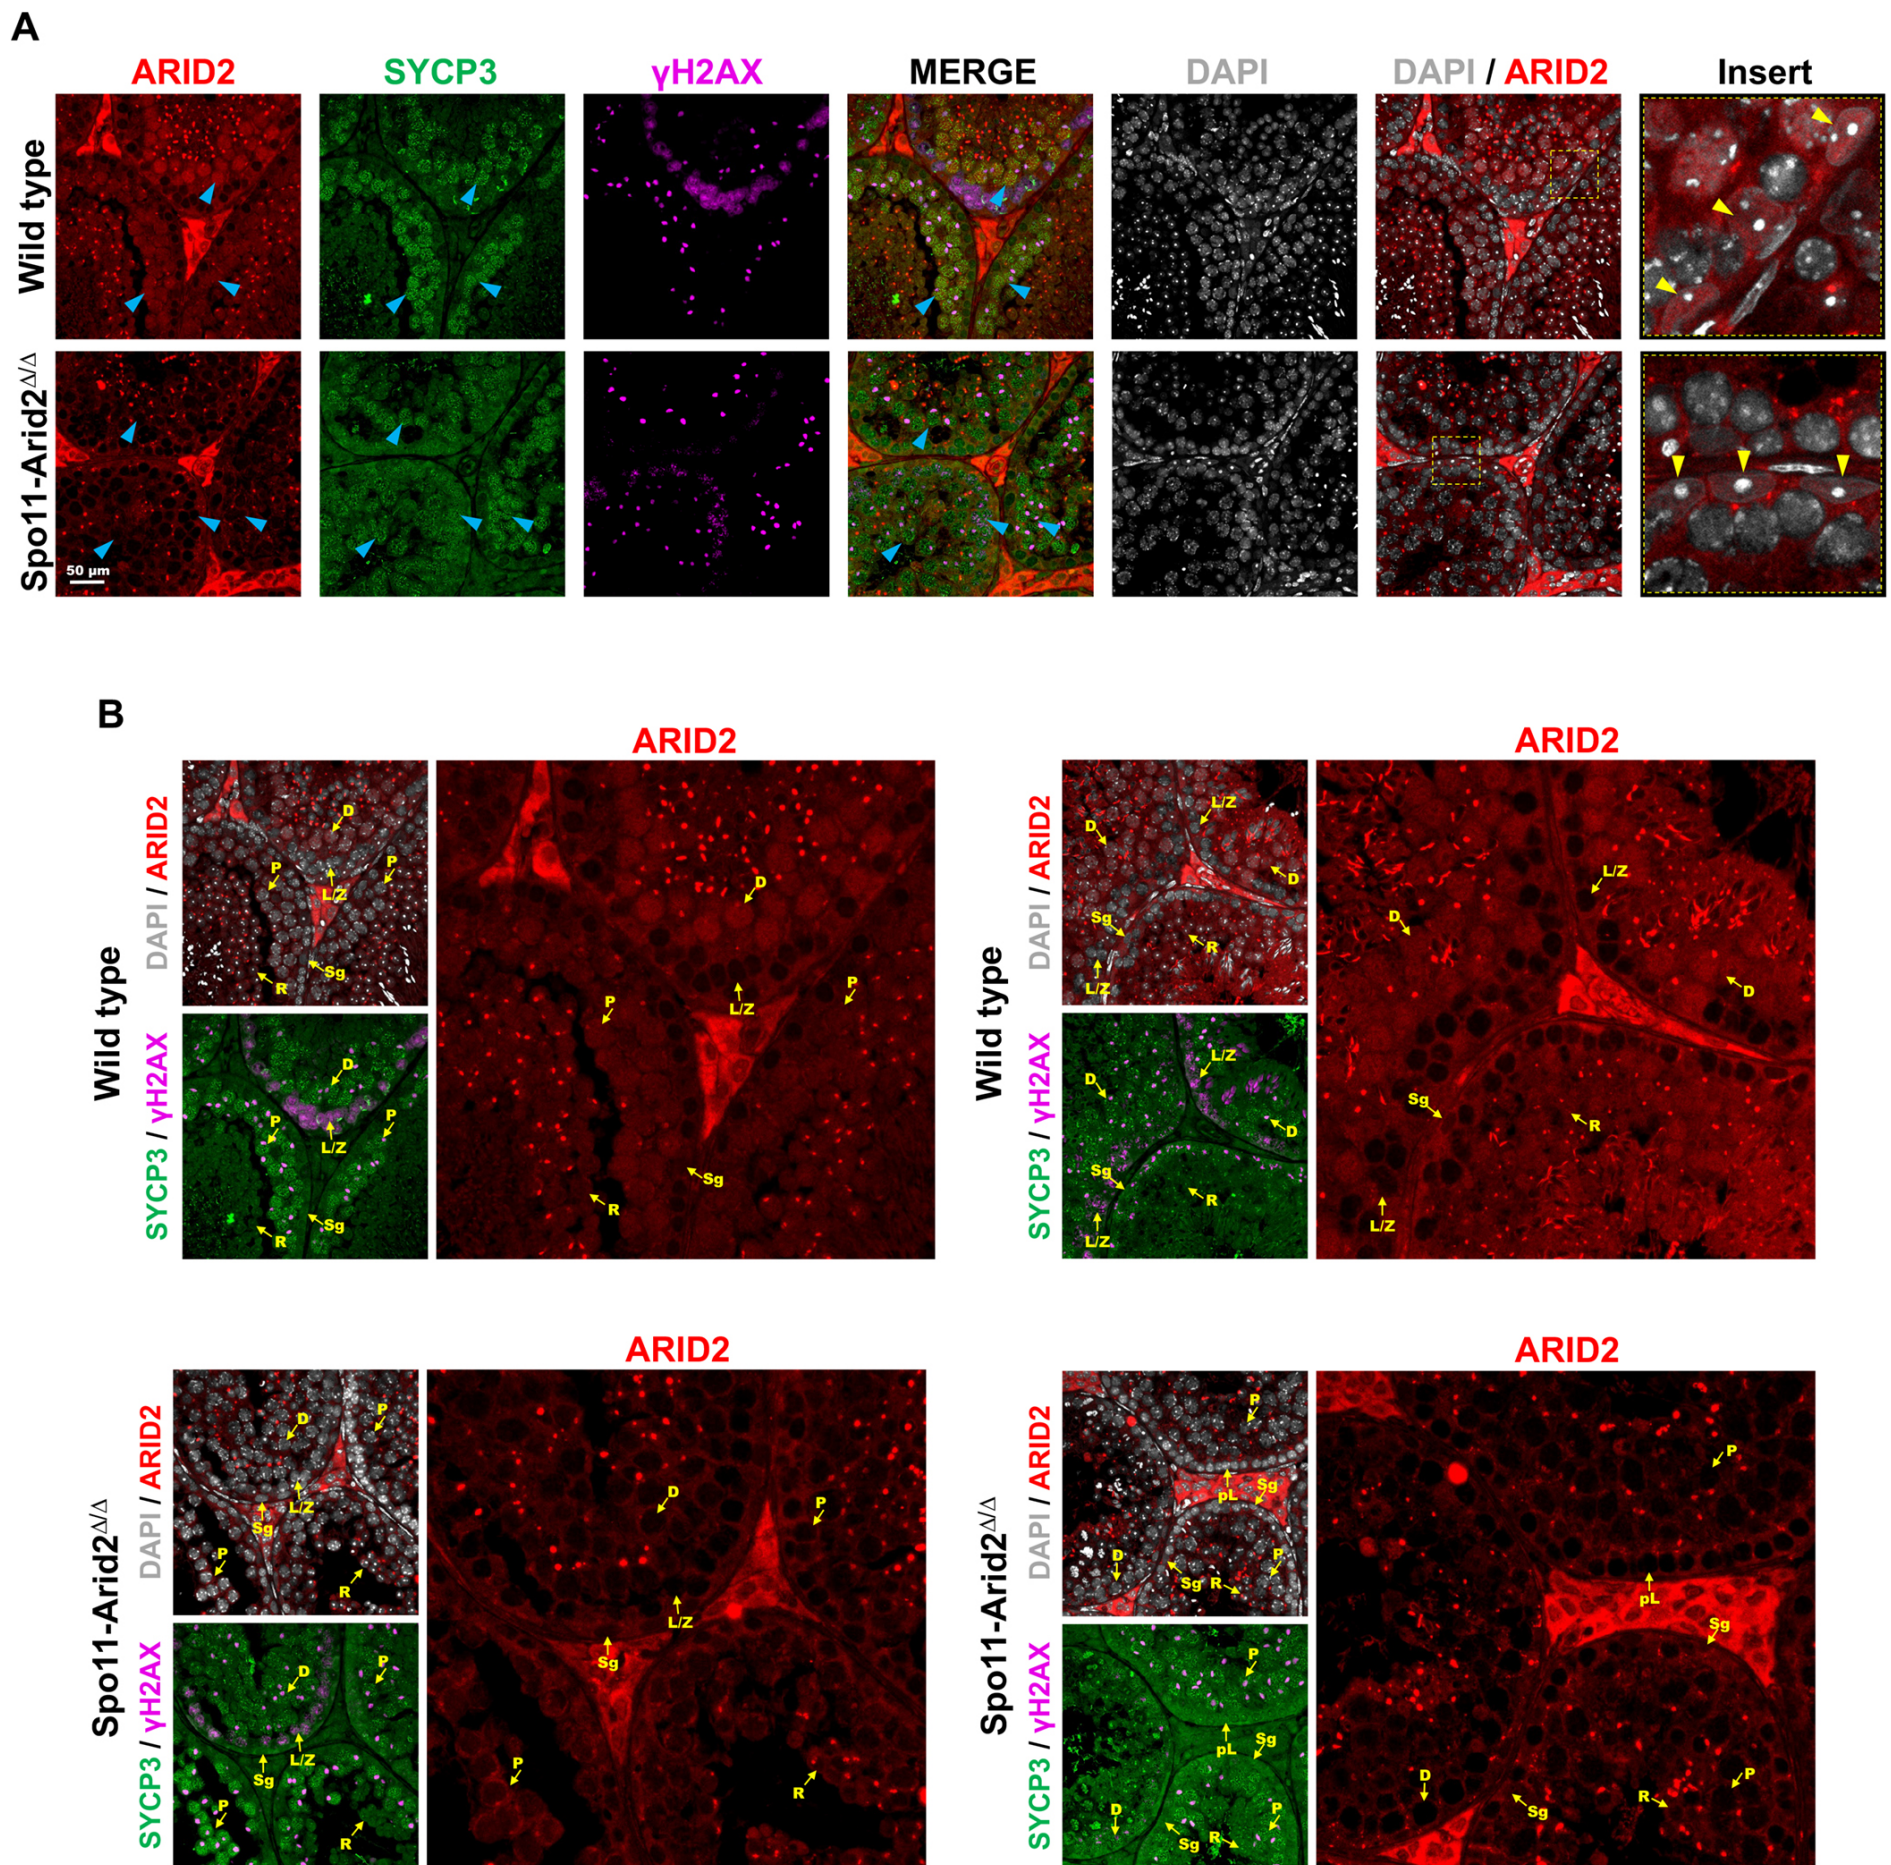

**Fig. S2. Analysis of ARID2 immunosignal in testis cuts of wild type and Spo11-Arid2 knockout. A.** Paraffin embedded cuts from Spo11-Arid2 knockout and wild type control stained with SYCP3, ARID2, and  $\gamma$ H2AX. Blue arrowheads mark examples of primary spermatocytes immunostained with ARID2 in wild type and Arid2 knockout testis. Magnifications in the far-right panels correspond to the yellow square inserts. Yellow arrowheads show examples of Sertoli cells still expressing ARID2 protein in both wild type and knockout mice. **B.** High magnification images showing cells at different stages of spermatogenesis immunostained with the indicated markers. Sg: spermatogonia, pL: pre-leptotene, LZ: leptotene/zygotene, P: pachytene, D: diplotene, and R: rounded. In these images we observed red foci in both wild type and knockout seminiferous tubules, possibly caused by a different antibody lot used in these experiments.

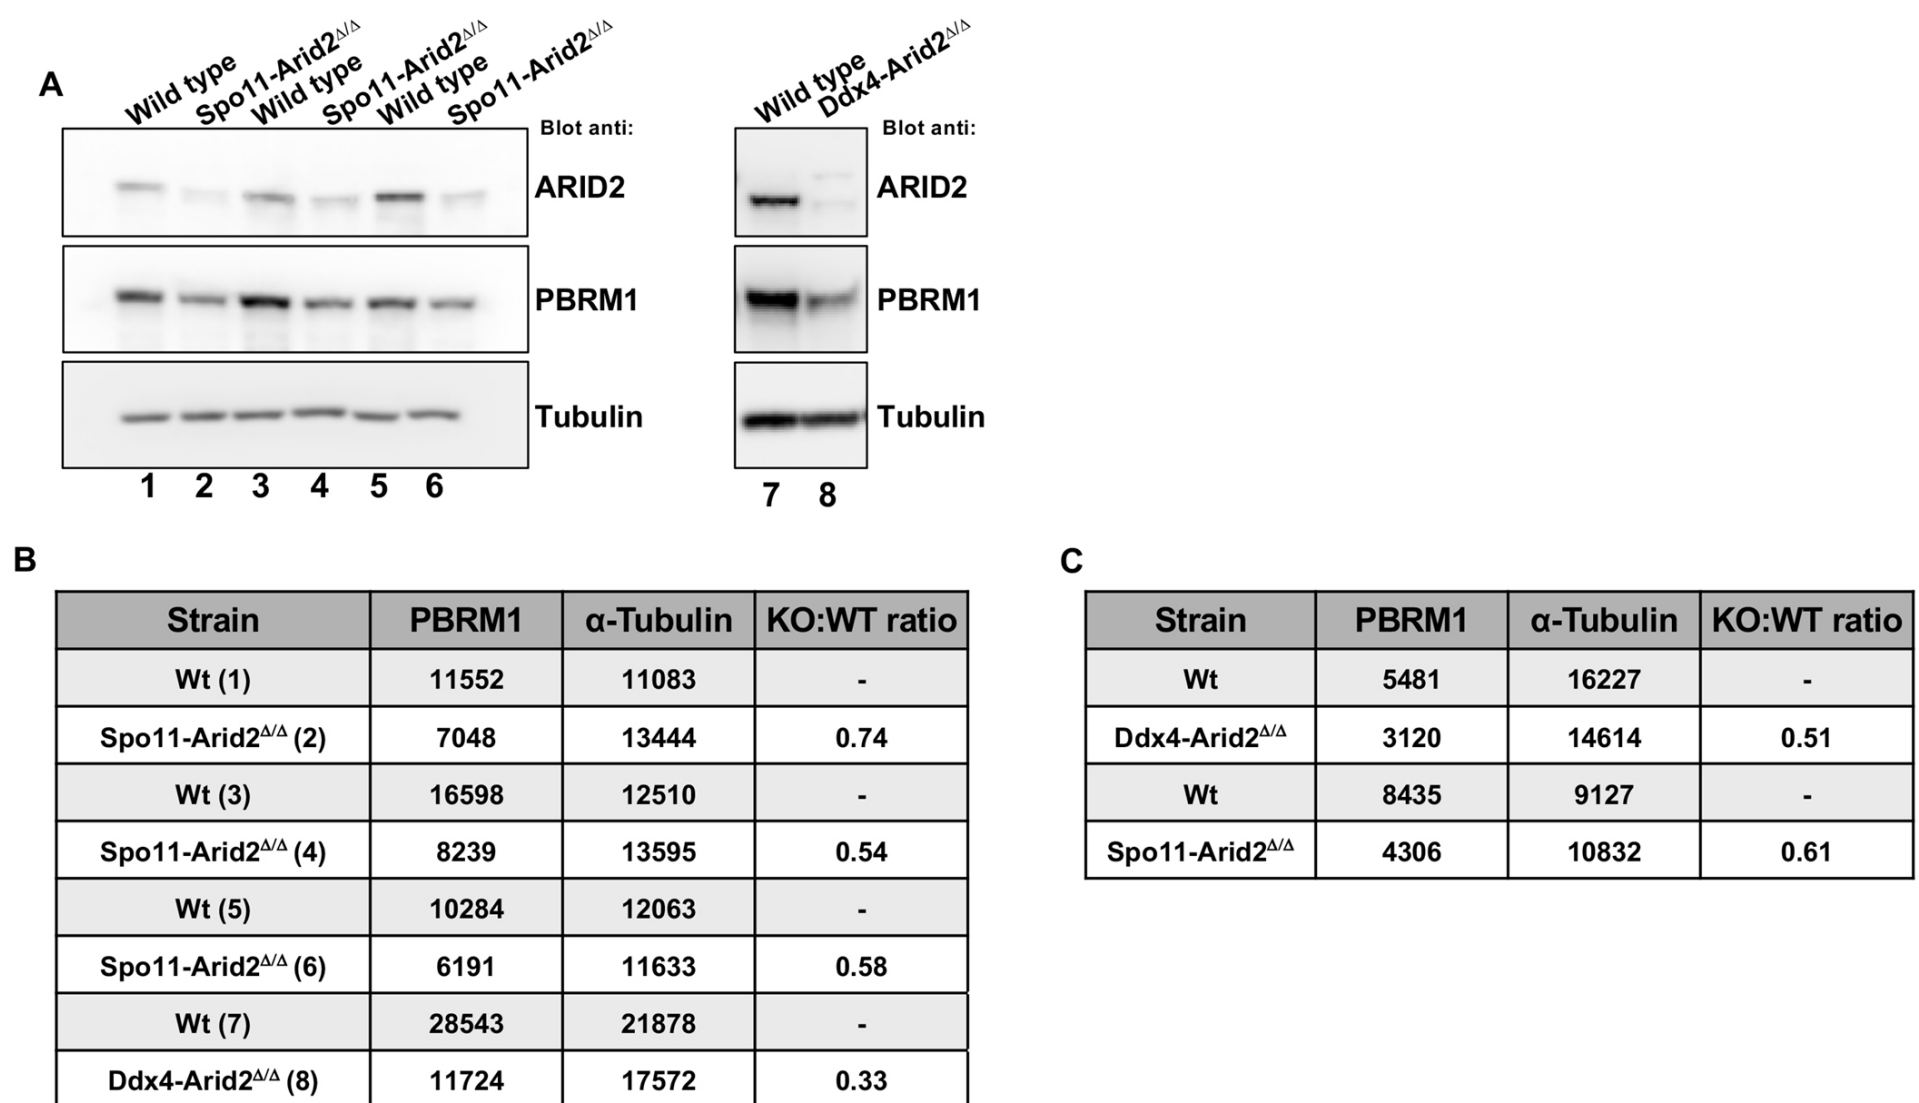

**Fig. S3. Reduction of PBRM1 protein levels in Arid2 knockout mice.** **A.** Western blots showing results for three 2-month-old independent mice of each wild type and Spo11-Arid2 knockout genotype (lines 1-6). The right panel contains western blot corresponding to an additional example of wild type and Ddx4-Arid2 knockout (lines 7, 8). **B.** Quantitation corresponding to PBRM1 and tubulin band density in western blots shown in A. To determine PBRM1 expression changes, PBRM1 immunosignal intensity was normalized to the corresponding tubulin values, followed by KO/Wt ratio calculation. **C.** Quantitation corresponding to band density in western blots shown in Figure 1A. PBRM1 expression changes were calculated as described in B.

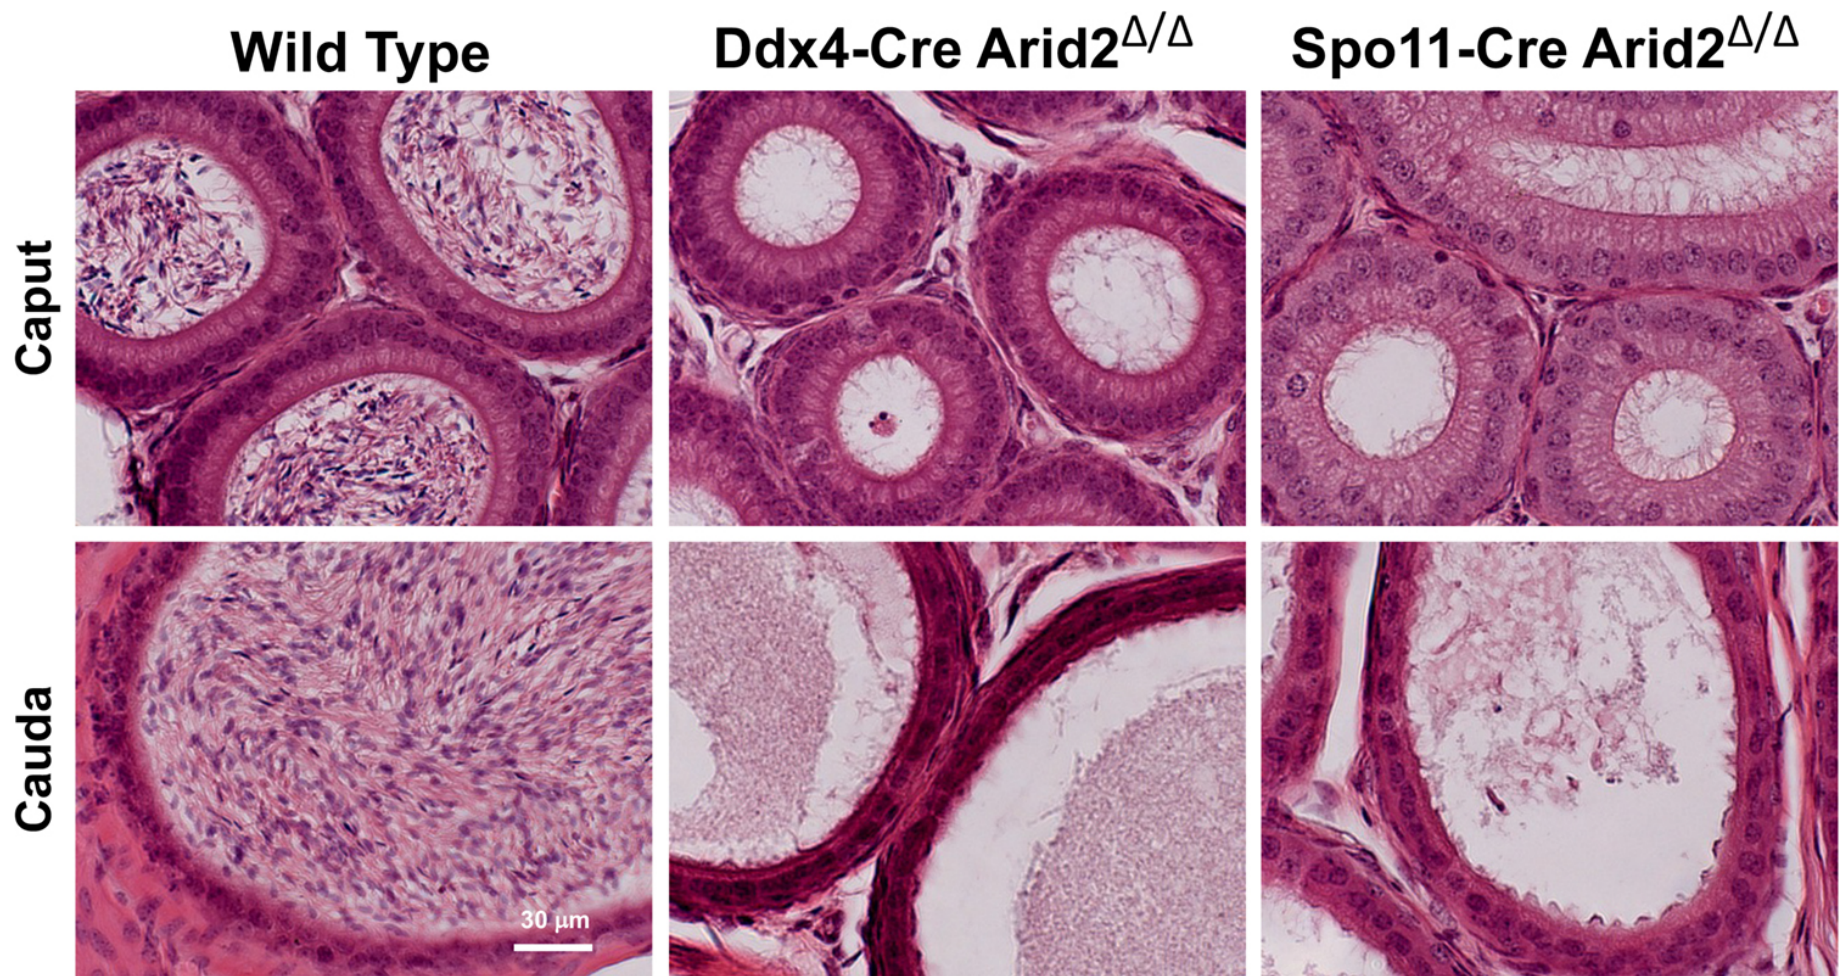

**Fig. S4. Images corresponding to H&E stained epididymis tubules.** Shown are the caput and cauda sections of the epididymis. Note the absent of spermatozoa in Arid2 knockout samples.

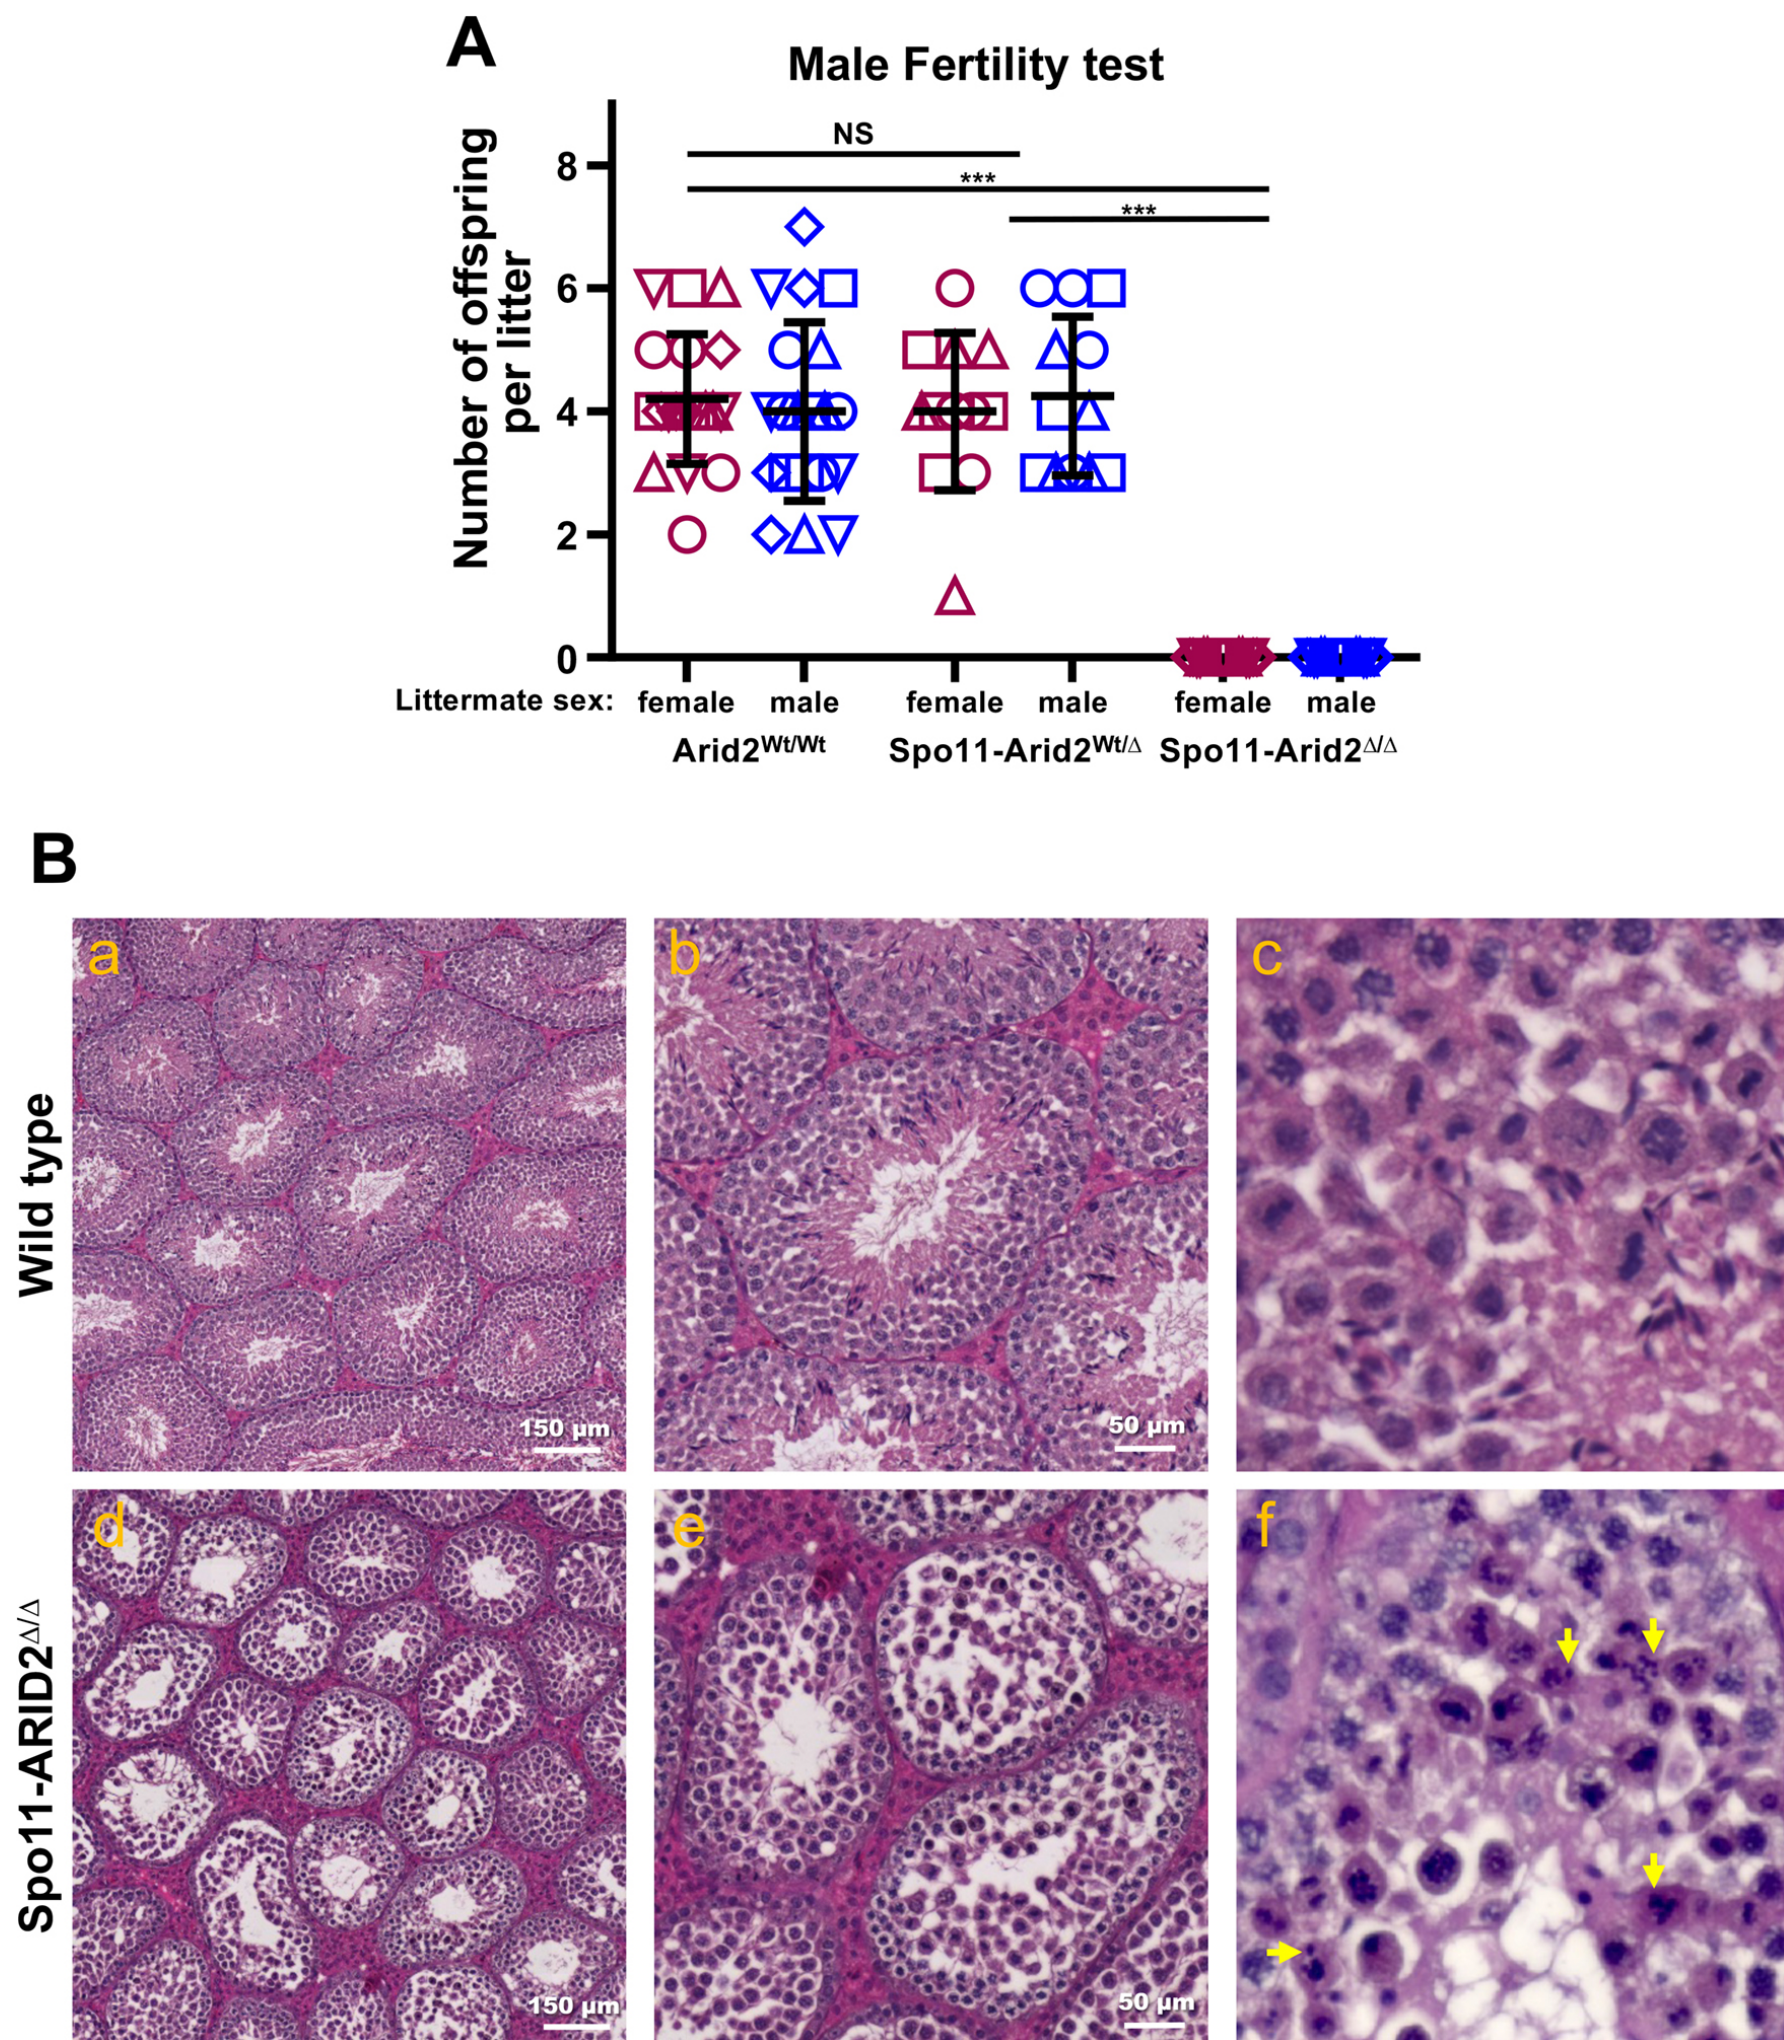

**Fig. S5. Fertility assessment and testis tissue analysis of 4-months-old wild type and Arid2 knockout mice.** **A.** The graph represents the number of male and female offspring resulting from mating the indicated male Arid2 genotype crossed with Arid2<sup>wt/wt</sup> females. NS, P=0.95. \*\*\*, P > 0.0001. Details of crosses are in Table S1. Experiments were conducted for a total of approximately 4 months. **B.** wild type and Spo11-Arid2<sup>Δ/Δ</sup> 4-months-old testis cuts stained with Hematoxylin & Eosin. Note meiosis arrest at meiosis exit in Spo11-Arid2 knockout. Arrows indicate examples of metaphase cells with lagging chromosomes.

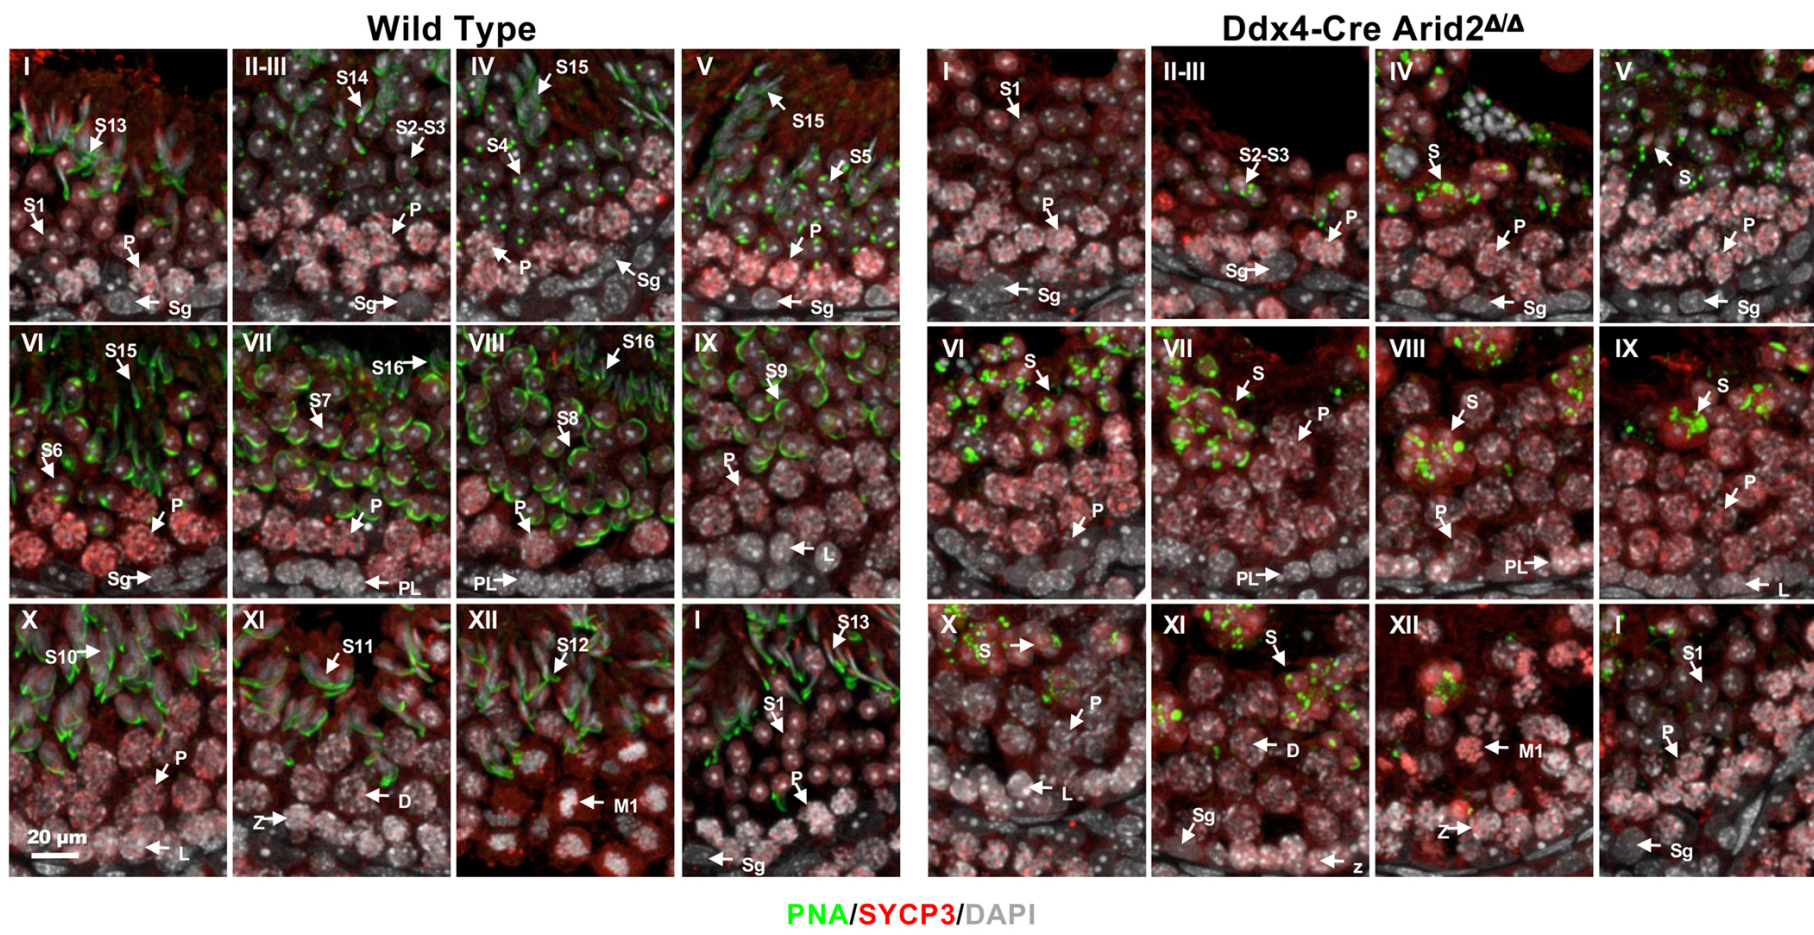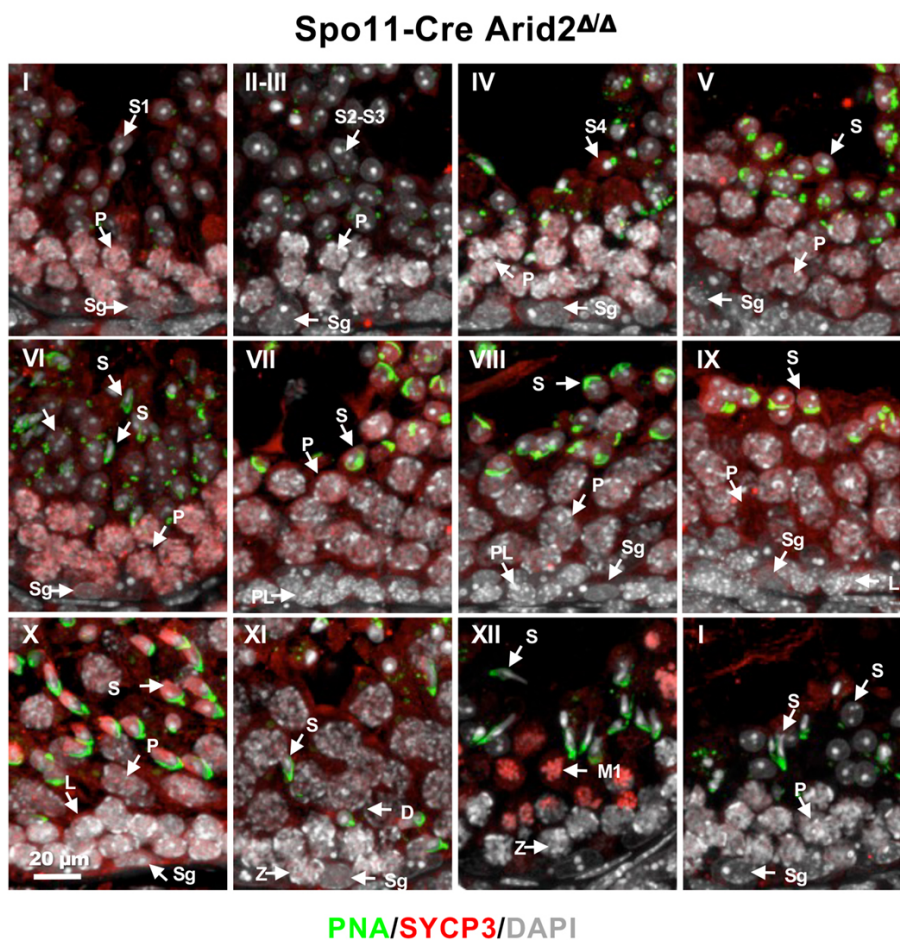

**Fig. S6. Characterization of gametogenesis arrest in *Arid2*<sup>Δ/Δ</sup> knockout mice.** Immunofluorescence of mouse seminiferous tubules with SYCP3 and lectin PNA showing representative stages I to XII. Note the spermatids differentiation failure in *Ddx4-Arid2*<sup>Δ/Δ</sup> and *Spo11-Arid2*<sup>Δ/Δ</sup> mice when compared to wild type. Sg-spermatogonia; PL-preleptotene; f and S-spermatids.

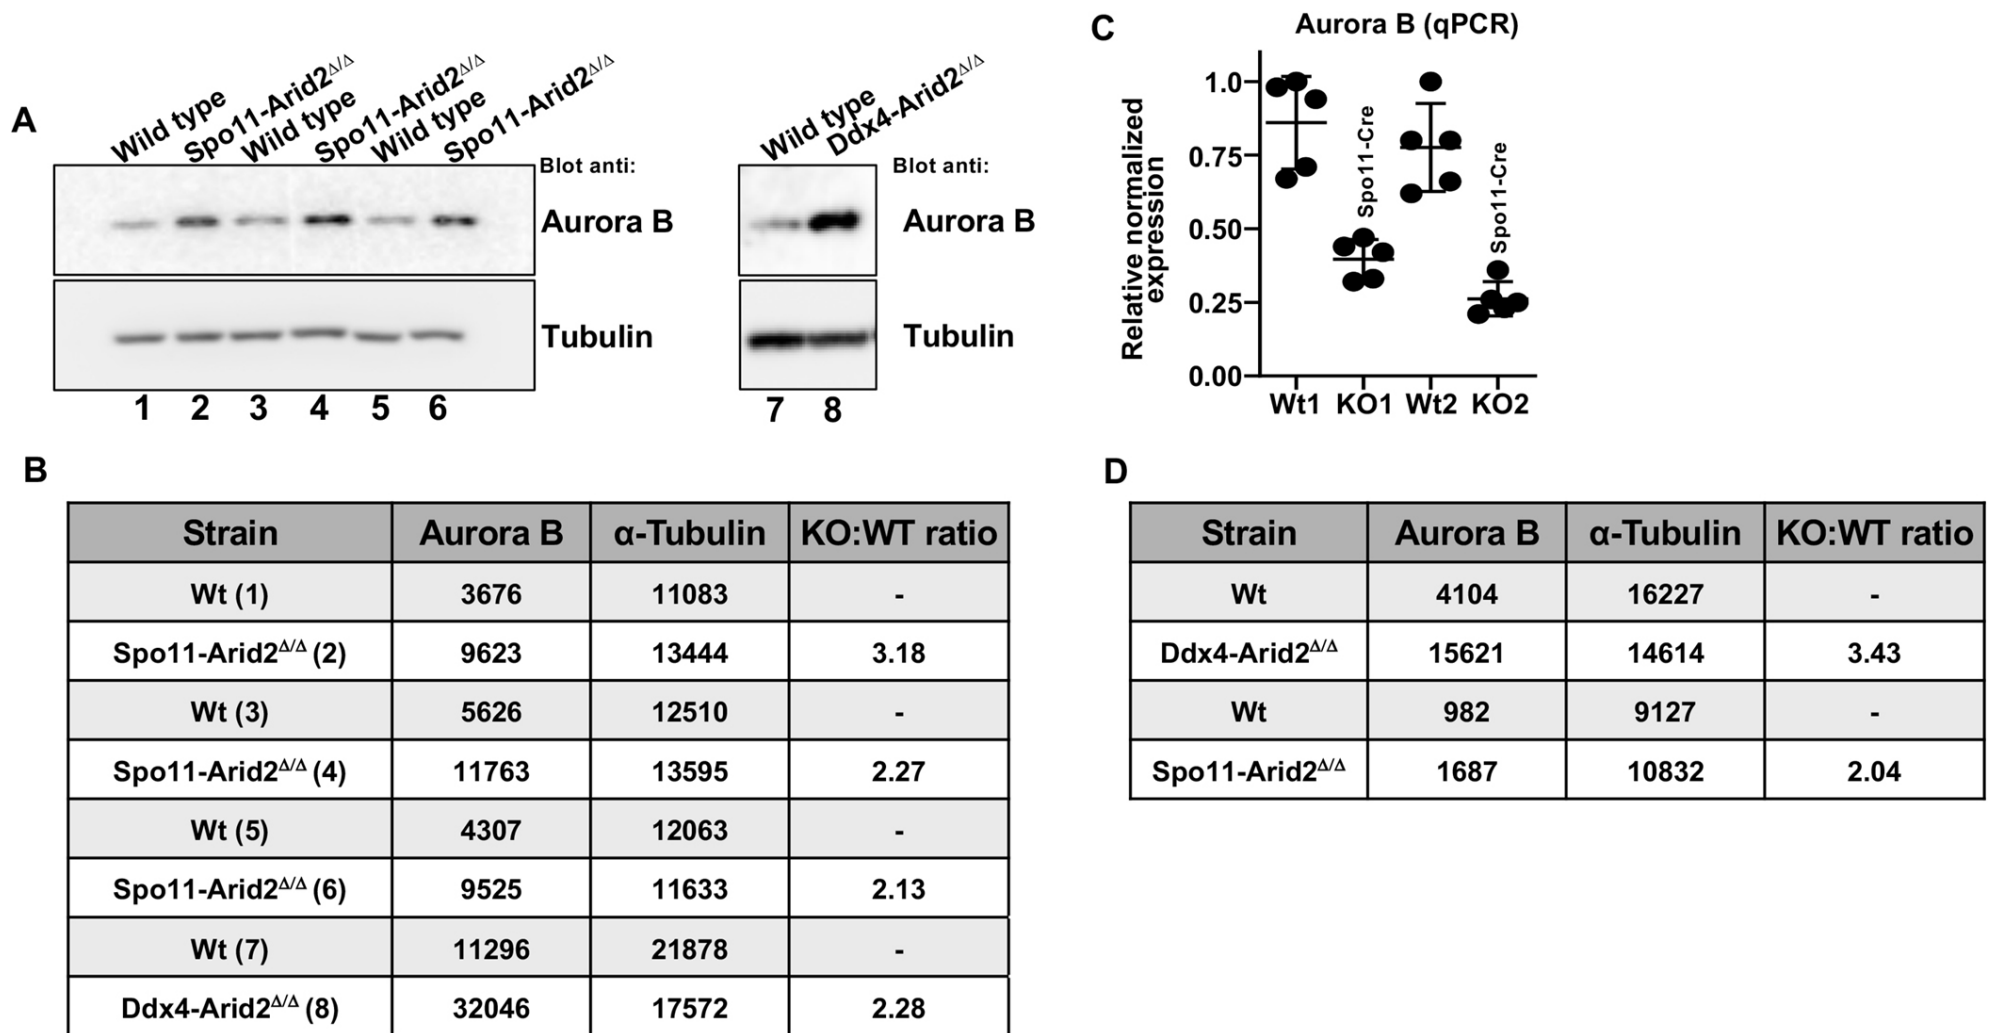

**Fig. S7. Aurora B expression analysis in 2-months-old wild type and Arid2 knockout testis.** **A.** Western blot showing increase in Aurora B in three different Spo11-Arid2 $\Delta/\Delta$  mice compared to wild type controls. Note that the tubulin panel is same as in figure S3A. **B.** Quantitation corresponding to Aurora B and tubulin band density in western blots shown in A.  $\circ$  determine Aurora B expression changes, Aurora B immunosignal intensity was normalized to the corresponding tubulin values, followed by KO/Wt ratio calculation. **C** he graph shows values obtained from q-PCR assessment of Aurora B gene expression monitored using two independent exon boundaries in 2-month-old wild type and Spo11-Arid2 knockouts. **D.** Quantitation corresponding to band density in western blots shown in figure 5A. Aurora B expression changes were calculated as described in B.

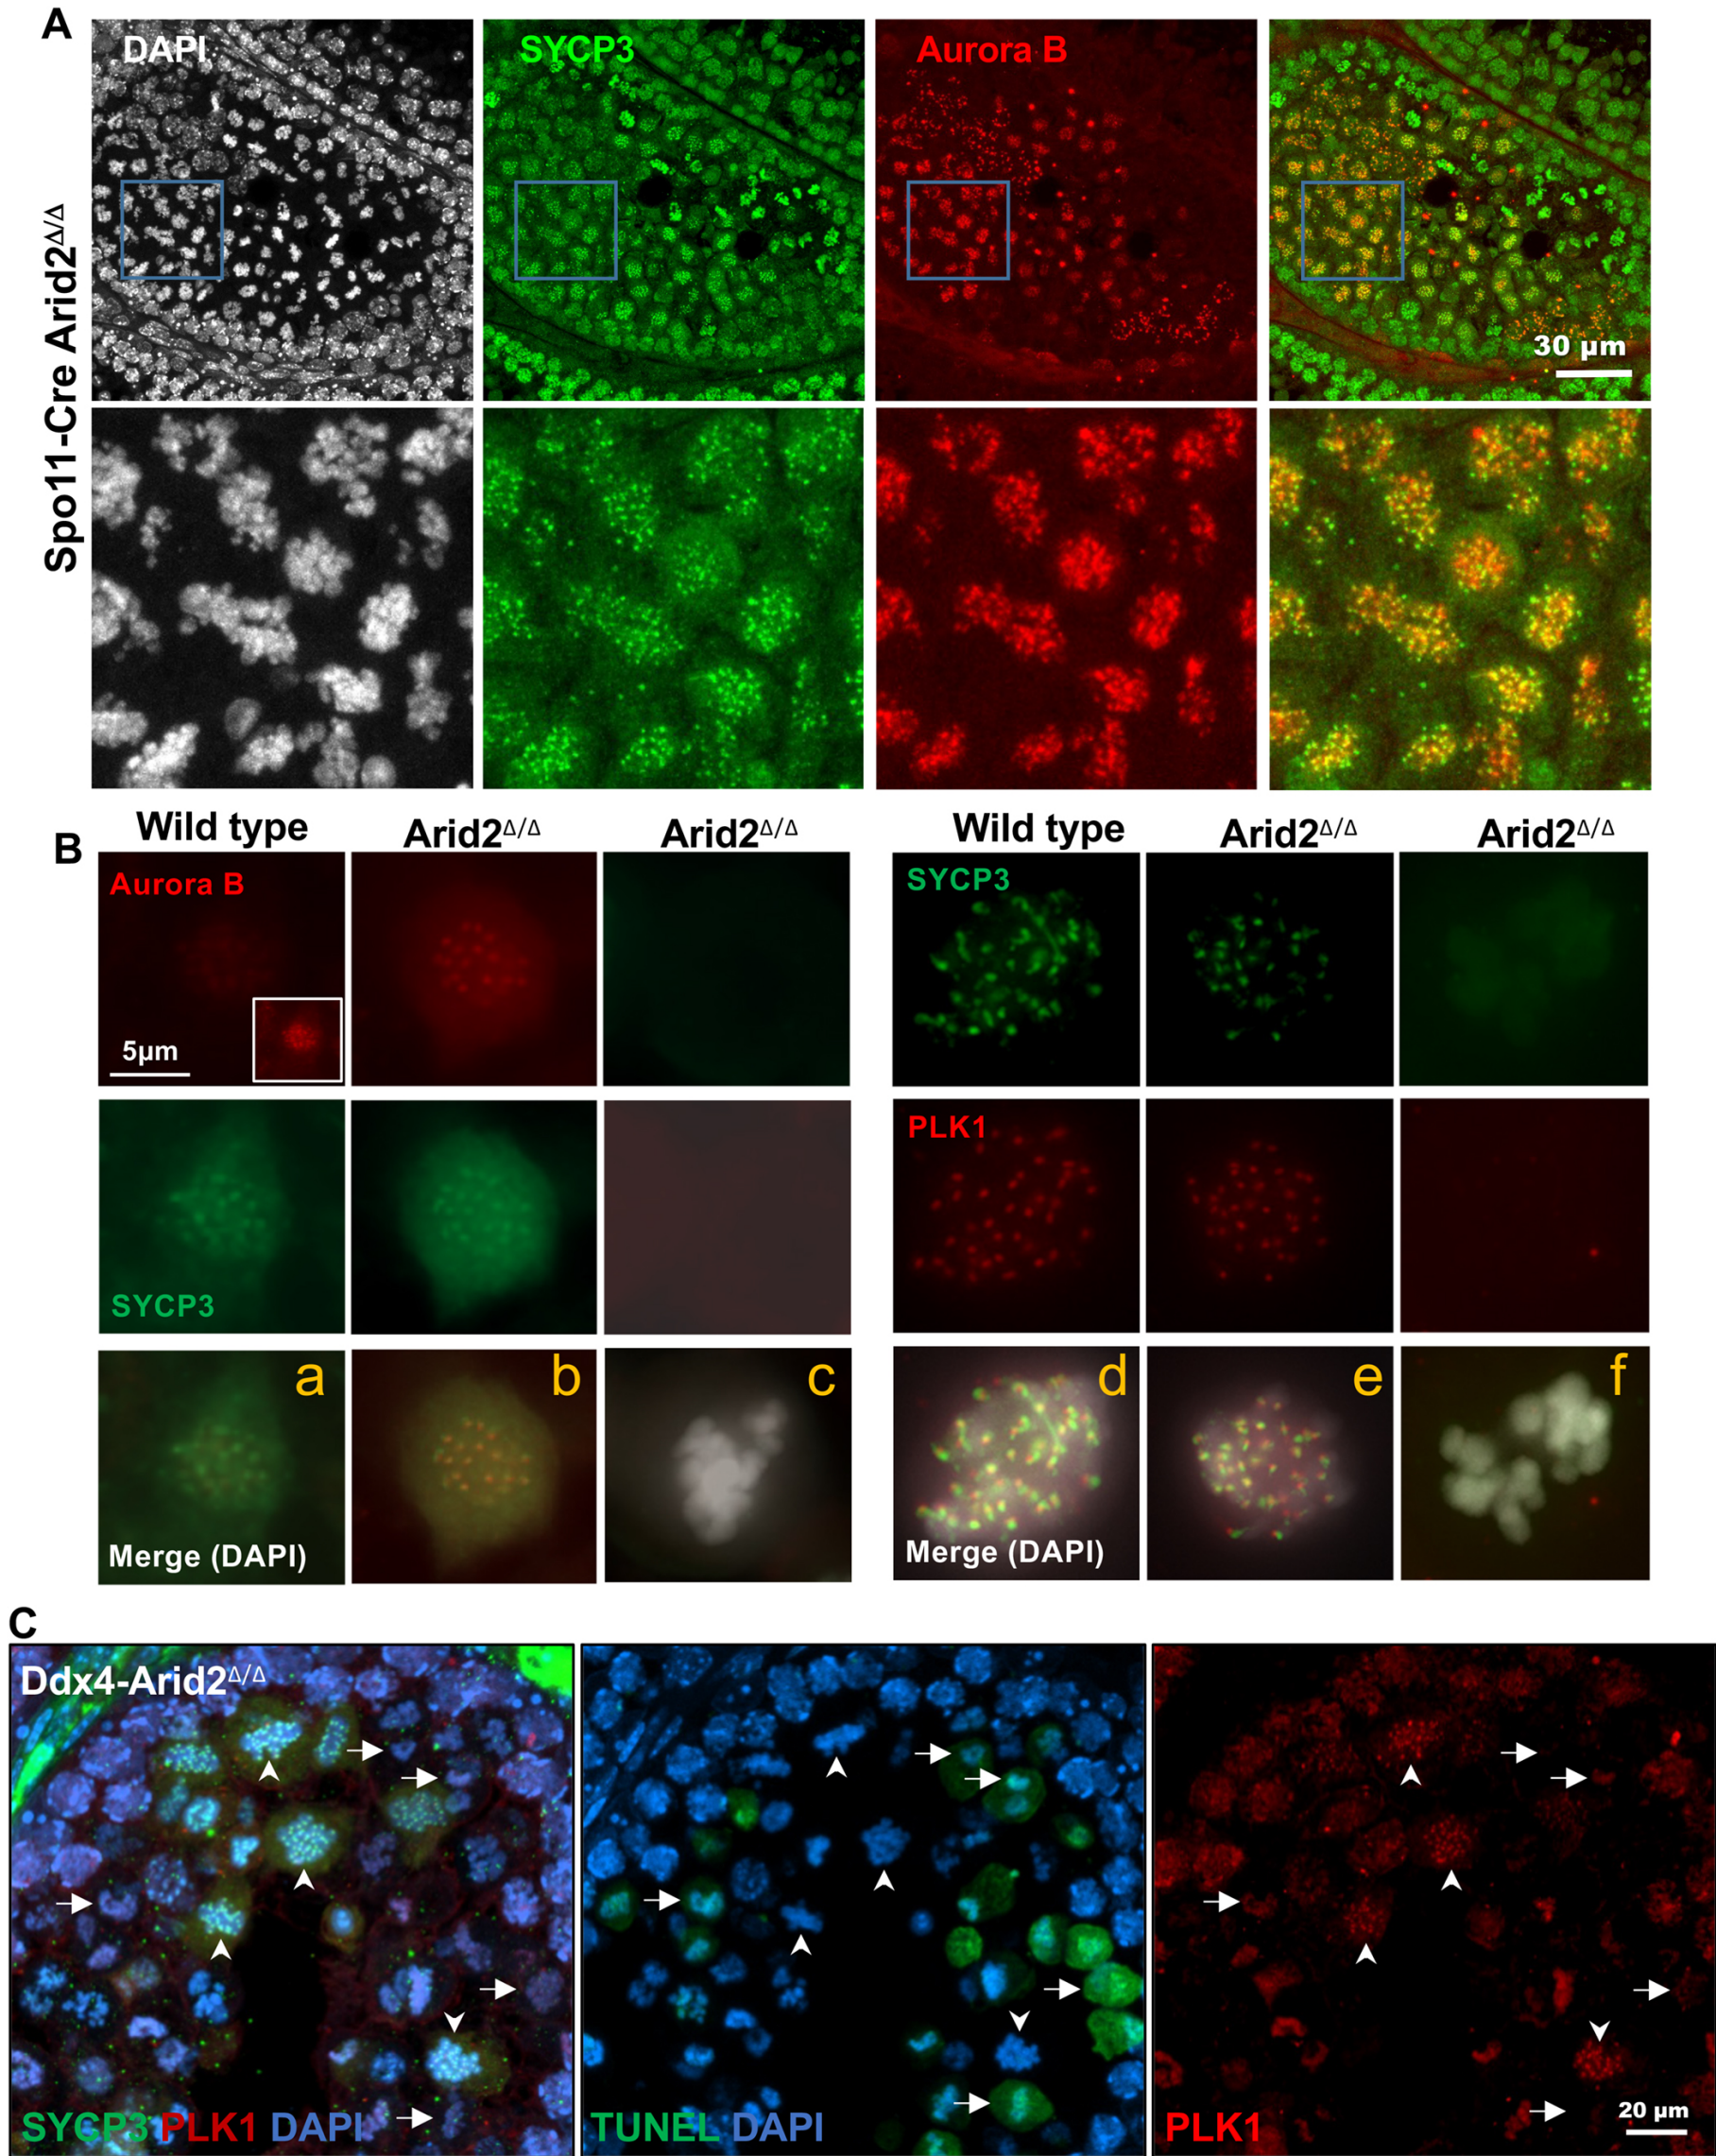



**Fig. S8. A.** Representative images of paraffin embedded testis cuts immunostained with SYCP3 and Aurora B in 2-month-old Spo11-Arid2 knockout mice (wild type control is shown in figure 5C top panel). The magnification (within the blue frame) shows cells transitioning metaphase-anaphase I immunostained with SYCP3 (which at this stage marks centromeres) and Aurora B. **B.** Representative images of cells at metaphase- anaphase I obtained from squashed seminiferous tubules immunostained with SYCP3, Aurora B, or PLK1 in wild type and Ddx4-Arid2 knockout mice. Note that the insert shows the cell with a longer exposure for Aurora B to allow comparison to knockout. **C.** Seminiferous tubule of 2-month-old Ddx4-Arid2<sup>Δ/Δ</sup> mice showing that PLK1 negative cells are also positive for TUNEL (marking apoptotic cells). Arrowheads indicate cells with PLK1 positive signal and negative for TUNEL. Arrows indicate cells positive for TUNEL and showing no signal for PLK1.

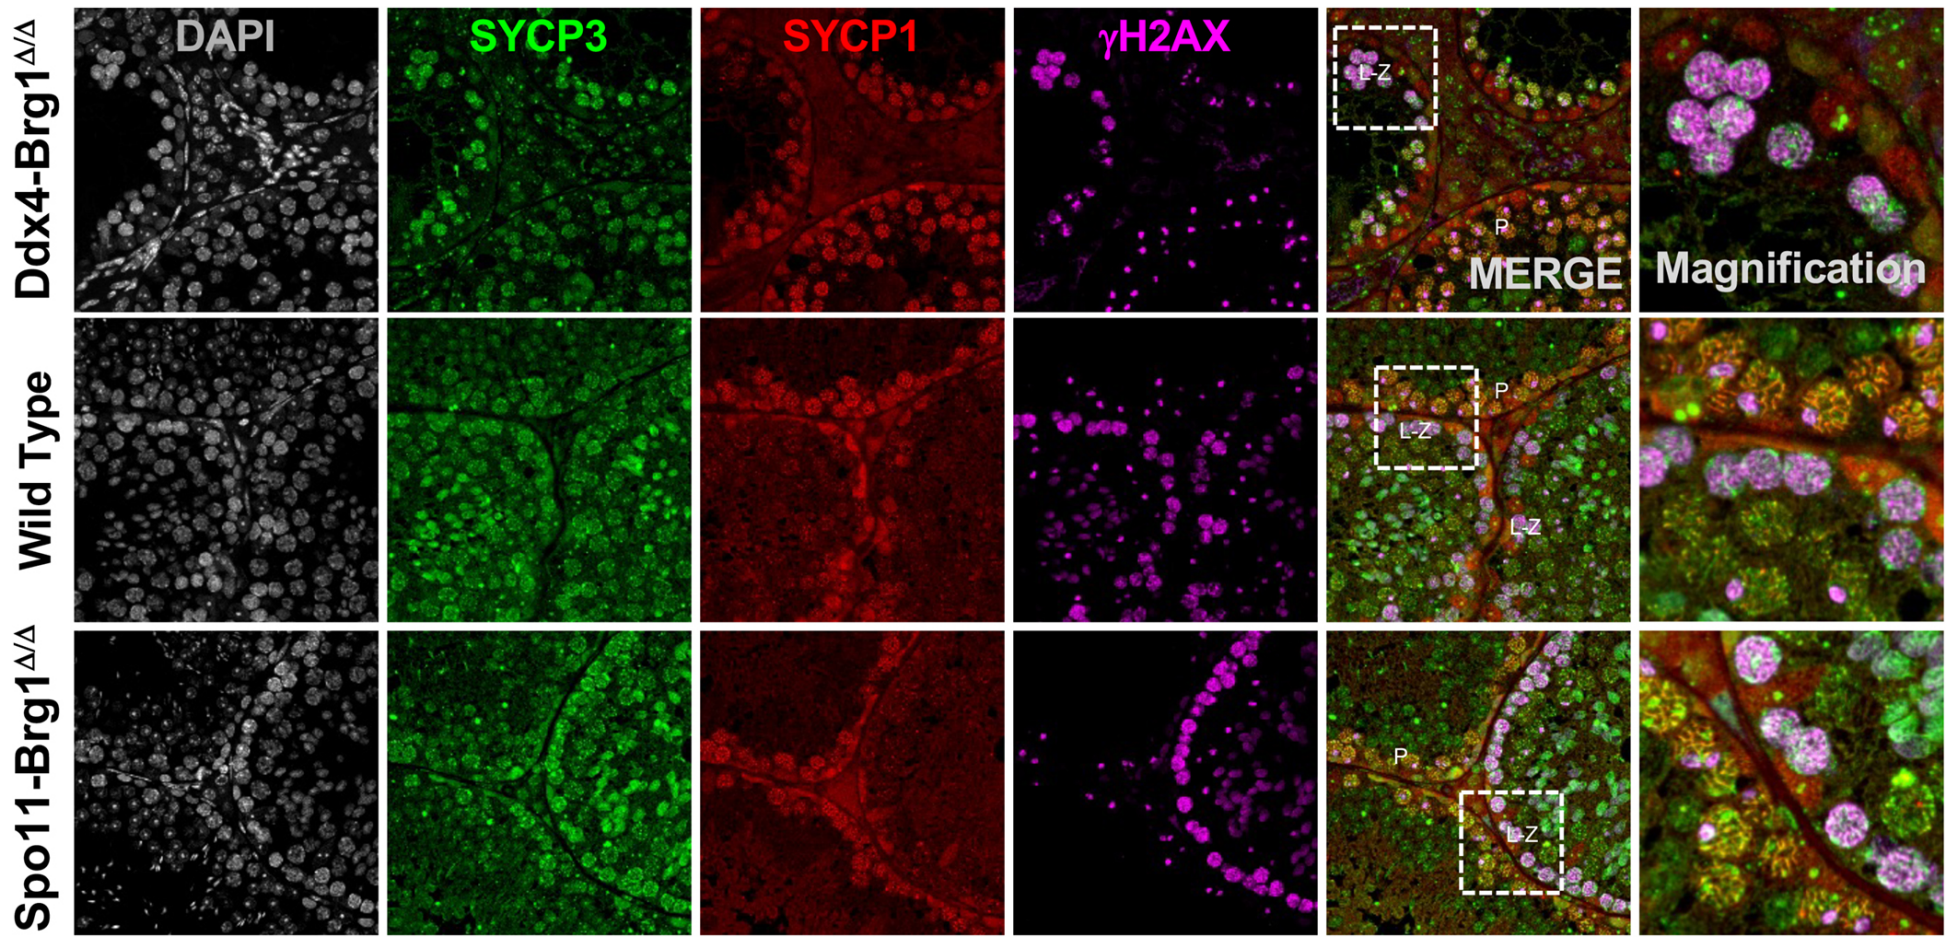

**Fig. S9. Immunohistochemical analysis of 2-months-old testis cuts from Ddx4-Brg1 knockout, Spo11-Brg1 knockout, and wild type mice.** Testis cuts were immunostained with SYCP1, SYCP3 and  $\gamma$ H2AX. Magnifications in the far-right panels correspond to the white square inserts. L-Z, leptotene/zygotene and P-pachytene

**Table S1.** Fertility assay of wild type, heterozygous, and Spo11-Arid2 knockout mice.**Primer sequences**

| Primer name                  | Sequence (5' → 3')        |
|------------------------------|---------------------------|
| ARID2 forward                | GAAACTCAAACAGGGCACAAAG    |
| ARID2 reverse                | AACAGCTGCTCTCTGTGTAAG     |
| ARID2 $\Delta$ reverse       | TTGGCCTTTCAGGATAGACTTAC   |
| LacZ forward                 | ATCACGACGCGCTGTATC        |
| LacZ reverse                 | ACATCGGGCAAATAATATCG      |
| BRG1 forward                 | GTCATACTTATGTCATAGCC      |
| BRG1 reverse                 | GCCTTGTCTCAAACCTGATAAG    |
| BRG1 $\Delta$ allele forward | GATCAGCTCATGCCCTAAGG      |
| Ddx4-Cre forward             | CACGTGCAGCCGTTTAAAGCCGCGT |
| Ddx4-Cre reverse             | TTCCCATTCTAAACAACACCCTGAA |
| Spo11-Cre forward            | CCATCTGCCACCAGCCAG        |
| Spo11-Cre reverse            | TCGCCATCTTCCAGCAGG        |

**Table S2.** Sequence of primers and PCR products for mouse genotyping.**PCRs primer pairs and expected size bands**

| PCR type                | Forward primer               | Reverse primer         | Expected size band (bp)                |
|-------------------------|------------------------------|------------------------|----------------------------------------|
| ARID2 Wt/floxed alleles | ARID2 forward                | ARID2 reverse          | 506 (floxed allele)<br>288 (Wt allele) |
| ARID2 $\Delta$ allele   | ARID2 forward                | ARID2 $\Delta$ reverse | 452                                    |
| LacZ Cassette           | LacZ forward                 | LacZ reverse           | 108                                    |
| BRG1 Wt/floxed alleles  | BRG1 forward                 | BRG1 reverse           | 387 (floxed allele)<br>241 (Wt allele) |
| BRG1 $\Delta$ allele    | BRG1 $\Delta$ allele forward | BRG1 reverse           | 268                                    |
| Ddx4-Cre                | Ddx4-Cre forward             | Ddx4-Cre reverse       | 240                                    |
| Spo11-Cre               | Spo11-Cre forward            | Spo11-Cre reverse      | 281                                    |

**Table S3.** List of antibodies and dilutions used in this study.

| Antibody            | Source                                                                 | Western blot dilution | Immuno-labeling dilution |
|---------------------|------------------------------------------------------------------------|-----------------------|--------------------------|
| ARID2/BAF200        | Sigma, #SAB2702507                                                     | 1:2500                | 1:200                    |
| ARID2/BAF200        | Our lab: ref: J Biol Chem. 2017 May 19; 292(20): 8459–8471. PMC5437250 | 1:3000                |                          |
| AurkB/AIM-1         | BD Biosciences, 611082                                                 | 1:500                 | 1:50                     |
| BRG1                | AbCam, 110641                                                          | 1:3000                |                          |
| BRG1                | Proteintech, 21634-1-AP                                                |                       | 1:200                    |
| PLK1                | AbCam, 17056                                                           | 1:1500                | 1:200                    |
| PBRM1/BAF180        | Bethyl, A301-591A                                                      | 1:3000                |                          |
| SMARCB1/BAF47       | Cell Signaling Tech., #91735                                           | 1:3000                |                          |
| SMARCC1/BAF155      | Cell Signaling Tech., #11956                                           | 1:500                 |                          |
| SMARCC2/BAF170      | Cell Signaling Tech., #12760                                           | 1:1000                |                          |
| Survivin            | NOVUS Biologicals, NB500-201                                           | 1:1000                |                          |
| SMARCE1/BAF57       | Cell Signaling Tech., #33360                                           | 1:1000                |                          |
| SYCP3               | Our lab: ref: PLoS Genet. 2018 May 9;14(5):e1007381. PMC5962103        |                       | 1:300                    |
| SYCP3               | AbCam, ab97672                                                         | 1:1000                |                          |
| SYCP1               | Novus, NB300-229                                                       |                       | 1:300                    |
| $\gamma$ H2AX       | Millipore, 05-636                                                      |                       | 1:1000                   |
| Lamin B             | AbCam, 16048                                                           | 1:2500                |                          |
| $\alpha$ -tubulin   | Proteintech, 66031-1-Ig                                                | 1:5000                |                          |
| Lectin PNA-Alexa488 | Invitrogen L21409                                                      |                       | 1:200                    |
